# Supplementary material for: Clinical Subphenotypes of Staphylococcus aureus Bacteremia
Source: PubMed Central journal article supplement (PMC11581694; doi:10.1093/cid/ciae338), 2024-06-25
Supplement: ciae338_supplementary_data.pdf [file ciae338_supplementary_data.pdf]

## Supplementary material

### Contents:

|                                                                                                     |     |
|-----------------------------------------------------------------------------------------------------|-----|
| Supplementary Table 1: Outcomes in Edinburgh and ARREST cohorts.....                                | p2  |
| Supplementary Table 2: Effect of adjunctive rifampicin stratified by sub-phenotype.....             | p3  |
| Supplementary Figure 1: Flow diagram for Edinburgh retrospective observational cohort.....          | p4  |
| Supplementary Figure 2: Selection of class defining variables.....                                  | p5  |
| Supplementary Figure 3: Additional features of sub-phenotypes in the Edinburgh cohort.....          | p6  |
| Supplementary Figure 4: Median Charlson Comorbidity Index of sub-phenotypes in the SAFO cohort..... | p7  |
| Supplementary Figure 5: One-year survival of sub-phenotypes in the Edinburgh cohort.....            | p8  |
| Supplementary Figure 6: Outcomes in the SAFO cohort.....                                            | p9  |
| List of ARREST investigators.....                                                                   | p10 |
| List of SAFO investigators.....                                                                     | p12 |

**Supplementary Table 1: Outcomes in Edinburgh and ARREST cohorts**

|                                 | Sub-phenotype |           |           |           |         | P-value |
|---------------------------------|---------------|-----------|-----------|-----------|---------|---------|
|                                 | A             | B         | C         | D         | E       |         |
| <b>Edinburgh cohort</b>         | n=147         | n=132     | n=103     | n=39      | n=37    |         |
| 84-day mortality                | 64 (43.8)     | 20 (15.5) | 25 (24.3) | 10 (26.2) | 2 (5.3) | <0.0001 |
| Persistence or recurrence       | 7 (4.8)       | 1 (0.8)   | 8 (7.8)   | 0         | 1 (2.7) | 0.04    |
| <b>ARREST placebo arm</b>       | n=60          | n=52      | n=138     | n=69      | n=69    |         |
| 84-day mortality                | 13 (21.7)     | 0         | 29 (21.0) | 11 (15.9) | 3 (4.3) | <0.0001 |
| Composite microbiologic failure | 1 (1.9)       | 0         | 11 (8.6)  | 6 (8.8)   | 3 (4.3) | 0.08    |

Results show the percentage of patients in each sub-phenotype with the specific outcome. Data shown as n (%). Outcomes were compared between sub-phenotypes within each cohort using Fisher's exact test.

**Supplementary Table 2: Effect of adjunctive rifampicin stratified by sub-phenotype**

|                                 | Placebo   | Adjunctive rifampicin | P-value |
|---------------------------------|-----------|-----------------------|---------|
| <b>Sub-phenotype A</b>          | n=60      | n=55                  |         |
| 84-day mortality                | 13 (21.7) | 12 (21.8)             | >0.99   |
| Composite microbiologic failure | 1 (1.9)   | 0 (0)                 | >0.99   |
| <b>Sub-phenotype B</b>          | n=52      | n=55                  |         |
| 84-day mortality                | 0 (0)     | 8 (14.5)              | 0.006   |
| Composite microbiologic failure | 0 (0)     | 1 (1.9)               | >0.99   |
| <b>Sub-phenotype C</b>          | n=138     | n=138                 |         |
| 84-day mortality                | 29 (21.0) | 24 (17.4)             | 0.54    |
| Composite microbiologic failure | 11 (8.6)  | 2 (1.6)               | 0.02    |
| <b>Sub-phenotype D</b>          | n=69      | n=52                  |         |
| 84-day mortality                | 11 (15.9) | 11 (21.2)             | 0.48    |
| Composite microbiologic failure | 6 (8.8)   | 3 (6.0)               | 0.73    |
| <b>Sub-phenotype E</b>          | n=69      | n=70                  |         |
| 84-day mortality                | 3 (4.3)   | 1 (1.4)               | 0.37    |
| Composite microbiologic failure | 3 (4.3)   | 1 (1.4)               | 0.62    |

Treatment outcomes within each sub-phenotype were compared using Fisher's exact test. Data shown as n (%). Two comparisons were made within each sub-phenotype so the significance level was set at 0.025 ( $\alpha=0.05$ ,  $n=2$ ).

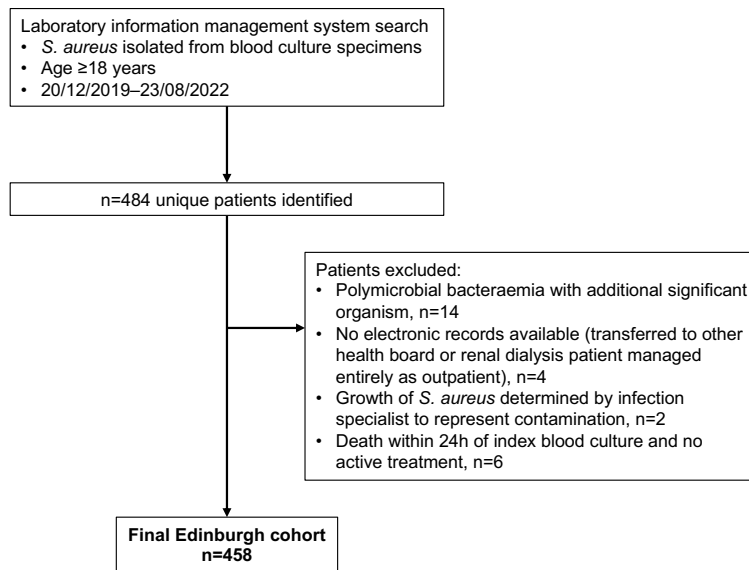

**Supplementary Figure 1: Flow diagram for Edinburgh retrospective observational cohort**

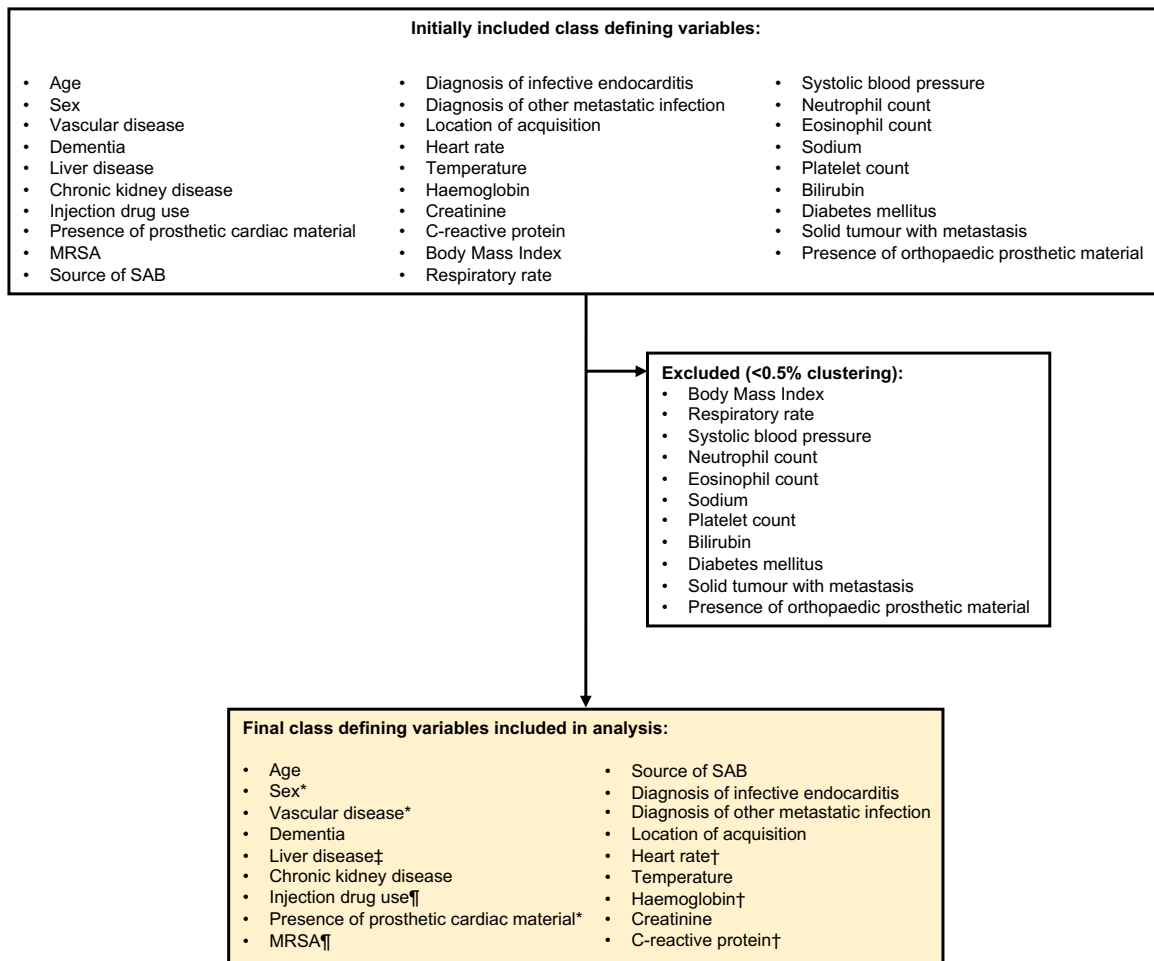

**Supplementary Figure 2: Selection of class defining variables**

Exclusions were based on contribution to clustering within the Edinburgh cohort. Variables marked with \* were not available for the ARREST cohort and † were not available for the SAFO cohort.

¶ people who inject drugs and people with MRSA bacteraemia were excluded from the SAFO trial.

‡ people with Child-Pugh C liver cirrhosis were excluded from the SAFO trial.

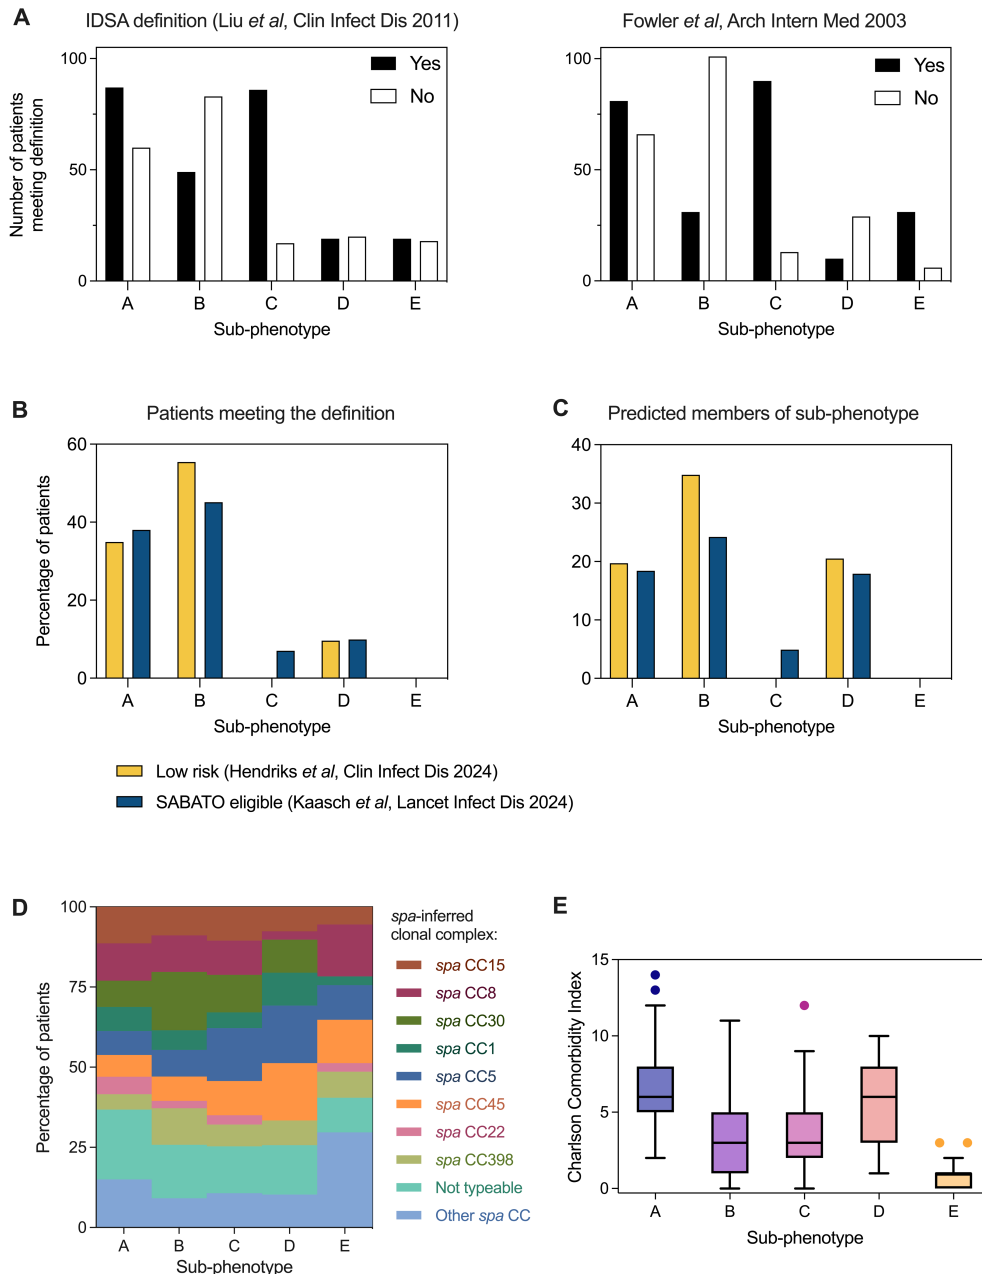

### Supplementary Figure 3: Additional features of sub-phenotypes in the Edinburgh cohort

**(A)** Proportion of patients in the Edinburgh cohort predicted to belong to each sub-phenotype, stratified by presence of complicated SAB using two different definitions. **(B)** Proportion of patients meeting two different definitions of low-risk SAB, stratified by predicted sub-phenotype membership (*i.e.* denominator is total number of patients meeting the definition). **(C)** Proportion of patients predicted to belong to each sub-phenotype meeting the definitions of low-risk SAB (*i.e.* denominator is total number of patients predicted to belong to each sub-phenotype). **(D)** *spa*-inferred clonal complex of *S. aureus* bloodstream isolates from the Edinburgh cohort, stratified by sub-phenotype. **(E)** Charlson Comorbidity Index of patients in the Edinburgh cohort, stratified by sub-phenotype. Box and whisker plot drawn using Tukey's method. Box shows interquartile range and horizontal line shows median.

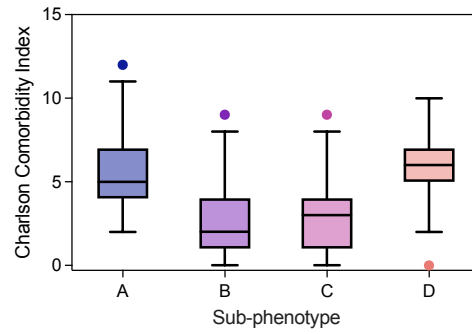

**Supplementary Figure 4: Median Charlson Comorbidity Index of sub-phenotypes in the SAFO cohort**  
Charlson Comorbidity Index of patients in the SAFO cohort, stratified by sub-phenotype. Box and whisker plot drawn using Tukey's method. Box shows interquartile range and horizontal line shows median.

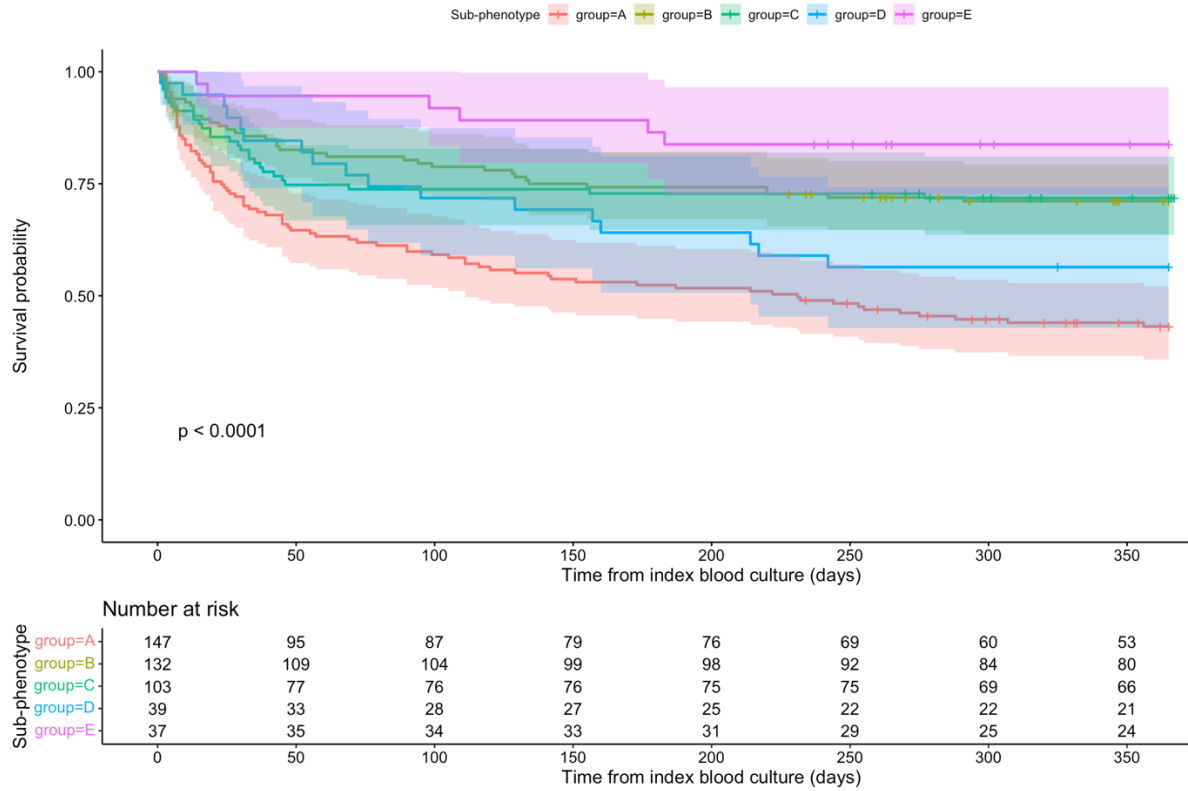

**Supplementary Figure 5: One-year survival of sub-phenotypes in the Edinburgh cohort**

Unadjusted 365-day survival. Kaplan-Meier survival curve, shaded area represents 95% confidence interval for percentage surviving. Sub-phenotypes compared using the log-rank test. Group designations correspond to sub-phenotypes.



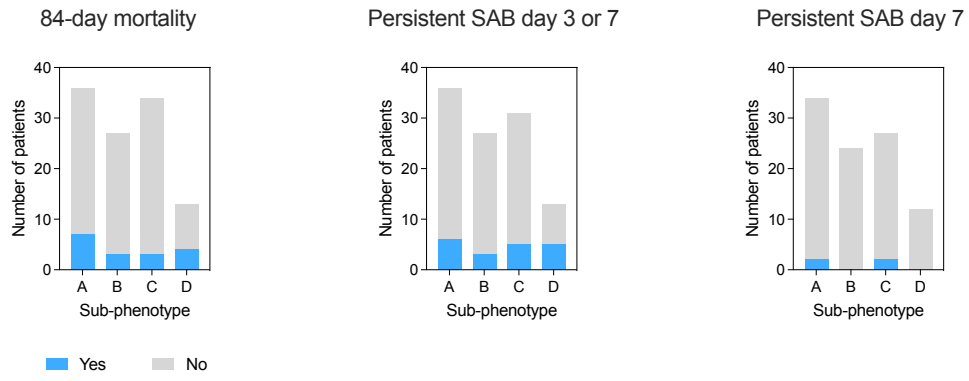

**Supplementary Figure 6: Outcomes in the SAFO cohort**  
 Data shown for the SAFO trial control arm participants.

## List of ARREST investigators

The ARREST trial group consists of:

### Participating Centres:

**Oxford University Hospitals NHS Trust:** M Scarborough, M Kamfose, A de Veciana, NC Gordon, L Peto, G Pill, T Clarke, L Watson, B Young, D Griffiths, A Vaughn, L Anson, E Liu, S Perera, L Rylance-Knight, C Cantell, R Moroney.

**Guy's and St Thomas' NHS Foundation Trust:** JD Edgeworth, G Thwaites, K Bisnauthsing, A Querol-Rubiera, C Gibbs, A Patel, C Hemsley, AL Goodman, D Wyncoll, J Biswas, J Fitzpatrick, L Roberts, J Millard, N Stone, A Cape, L Hurley, C Kai Tam.

**The Royal Liverpool and Broadgreen University Hospitals NHS Trust:** E Nsutebu, M Hoyle, K Maitland, L Trainor, H Reynolds, J Harrison, J Anson, J Lewis, J Folb, L Goodwin, N Beeching, S Dyas, H Winslow, E Foote, P Roberts, P Natarajan, A Chrdle. M Fenech, H Allsop.

**Plymouth Hospitals NHS Trust:** R Tilley, R Austin-Hutchison, L Barrett, K Brookes, L Carwithen, A Conbeer, R Cunningham, C Eglinton, R Fok, H Gott, S Hughes, L Jones, M Kalita, A King, L March, M Marner, T Mynes, A Plant, S Price, J Sercombe, A Stolton, M Wallis, M West, J Westcott, C Williams, R Wosley, L Yabsley.

**Sheffield Teaching Hospitals NHS Foundation Trust:** J Greig, L Butland, J Sorrell, T Mitchell, A Alli, J Meiring, B Masake, C Rowson, L Smart, L Makey, S Moll, J Cunningham, K Ryalls, K Burchall, J Middle, Y Jackson, D Swift, J Cole, B Subramanian, F Okhuoya, M Edwards, C Bailey, R Warren, G Islam, M Ankcorn, S Birchall, P Jones, J Humphries, S Booth, C Evans.

**Portsmouth Hospitals NHS Trust:** S Wyllie, A Flatt, L Strakova, M Hayes, S Valentine, C James, M Wands, N Cortes, N Khan, R Porter, Z Martin, K Yip, H Preedy, H Chesterfield, T Dobson, C Walker.

**Brighton and Sussex University Hospitals NHS Trust:** M Llewelyn, A Dunne, L Latter, A Porges, J Price, J Paul, L Behar, L Robinson, A Murray, J Fitzpatrick, T Sargent, C Ridley, L Ortiz-Ruiz de Gordo, D Gilliam, C McPherson, S Matthews, E Foreman, R Jarghese, A Beddoe, S Martin, S Shaw, D Wlazly, M Cole, A Gihawi, K Cole.

**Cambridge University Hospitals NHS Foundation Trust:** ME Török, T Gouliouris, L Bedford, RB Saunderson, I Mariolis, R Bousfield, I Ramsay, D Greaves, S Aliyu, K Cox, L Mlemba, L Whitehead, N Vyse, M Bolton

**South Tees Hospitals NHS Foundation Trust:** J Williams, P Lambert, D Chadwick, K Baillie, M Cain, R Bellamy, J Wong, J Thompson, H Vassallo, A Skotnicka, A Boyce, A Donnelly.

**University College London Hospitals NHS Foundation Trust:** P Wilson, G FitzGerald, V Dean, K Warnes, A Reyes, S Rahman, L Tsang, J Williams, S Morris-Jones.

**Royal Free London NHS Foundation Trust:** S Hopkins, E Witness, O Brady, E Woodford, T Pettifer, A McCadden, B Marks, S Collier, D Mack, S Warren, C Brown, A Lyons, S Taiyari, S Mephram, A Sweeney, L Brown.

**Royal Devon and Exeter NHS Foundation Trust:** C Auckland, A Potter, J Mandiza, M Hough, S Williams, C Renton, F Walters, M Nadolski, M Hough, A Evans, P Tarrant, S Williams, K Curley, S Whiteley, J Halpin, M Hutchings, S Todd, C Lohan, T Chapter, E Folland, A Colville, K Marden, M Morgan, R Fok, R Porter, M Baxter.

**The Leeds Teaching Hospital NHS Trust:** J Minton, S Rippon, M Cevik, J Chapman, T Kemp, R Vincent, D Osborne, T Platt, J Calderwood, B Cook, C Bedford, L Galloway-Browne, N Abberley, K Attack, J Allen.

**Aintree University Hospital NHS Foundation Trust:** P Lal, M Harrison, S Stevenson, C Brooks, P Harlow, J Ewing, S Cooper, R Balancio-Tolentino, L O'Neil, R Tagney, D Shackcloth.

**St George's Healthcare NHS Trust:** T Planche, J Fellows, R Millett, J Studham, C de Souza, G Howell, H Greaves, E Foncel, R Kurup, J Briggs, M Smith, C Suarez, G Sorrentino, A Scobie, A Houston, F Ahmad, A Breathnach, R Chahuan, K Wilkins.

**Blackpool Teaching Hospitals NHS Foundation Trust:** A Guleri, N Waddington, R Sharma, P Flegg, V Kollipara, M Alam, A Potter, S Donaldson, C Armer, J Frudd.

**King's College Hospital NHS Foundation Trust:** D Jeyaratnam, M Joy, A Mathews, SK Glass, A Ajayi, A Fife, S Qaiser, S Sheehan, S Muñoz Villaverde, NO Yogo, I De Abreu, G Notcheva, J Flanagan, C Watson, E Sais, A Adedayo, V Chu, G Shaw, MA Graver, R Palmer, D Palmer, S Haile, J Gordon, C Kai Tam, Mandar K, W Szypura.

**Heart of England NHS Foundation Trust:** N Jenkins, J Marange, V Shabangu, K Moore, J Lyons, M Munang, M Sangombe, E Moran, A Hussain.

**University Hospitals of Leicester NHS Trust:** M Wiselka, A Lewszuk, S Batham, K Ellis, L Bahadur, H White, M Pareek, A Sahota, S Coleman, H Pateman, A Kotecha, C Sim, A Rosser.

**County Durham and Darlington NHS Foundation Trust:** D Nayar, J Deane, R Nendick, C Aldridge, A Clarke, M Wood, A Marshall, L Stephenson, T Matheson-Smith, J Sloss, K Potts, J Malkin, L Ftika, V Raviprakash.

**University Hospital Southampton NHS Foundation Trust:** J Sutton, A Malachira, M Kean, K Criste, K Gladas, C Andrews, C Hutchison, E Adams, J Andrews, B Romans, N Ridley, M Ekani, J Mitchell, N Smith, T Clark, S Glover, R Reed, T Yam, H Burton, R Said.

**Wirral University Teaching Hospital NHS Foundation Trust:** D Harvey, A Janvier, R Jacob, C Smalley, A Fair.  
**Dartford & Gravesham NHS Trust:** A Gonzalez-Ruiz, S Lord, K Ripalda, H Wooldridge, L Cotter, G Cardoso, E Strachan, G Kaler, A Mohamoodally, E Lawrence, Z Prime, R Abrahams.

**The Newcastle upon Tyne Hospitals NHS Foundation Trust:** DA Price, L Rigden, L Shewan, K Cullen, I Emmerson, K Martin, H Wilson, C Higham, K L Taylor, E Ong, B Patel, H Bond, J Gradwell, J Widdrington.

**North Cumbria University Hospitals:** C Graham, S Thornthwaite, U Poultney, H Crowther, H Fairlamb, E Hetherington, C Brewer, S Banerjee, C Hamson, A McSkeane.

**Bradford Teaching Hospitals NHS Foundation Trust:** P McWhinney, P Sharratt, J Thorpe, S Kimachia, H Wilson, B Jeffs, L Masters, J Wilson, J Platt, L Burgess.

**Salford Royal NHS Foundation Trust:** P Chadwick, A Jeans, C Keatley, A Moran, Z Swann, K Pagett, A Peel, J Howard.

**Royal United Hospital Bath NHS Trust:** S Meisner, K Maloney, A Masdin, L Wright.

**Hull and East Yorkshire Hospitals NHS Trust:** G Barlow, S Crossman, V Lowthorpe, E Moore, P Moss, A Parkin, A Wolstencroft, B Warner, C Tarbotton, A Eyre, A Anderson, T Burdett, A Drifill.

**Trial Coordination and Oversight - MRC CTU at UCL, London:** AS Walker, F Hudson, A Szubert, J Cairns, D Ward, H Webb, C Russell, B Jackson, D Otiko. **Data Management Systems:** C Borg, L Masters, Z Islam, C Diaz, D Johnson

**Trial Steering Committee:** (Independent) A Martineau (Chair), A Kaasch, G Scott, J Bostock. (Team) G Thwaites, AS Walker, G Barlow, S Hopkins.

**Data Monitoring Committee:** D Laloo (Chair), M Wilcox, D Altman.

**Independent Endpoint Review Committee:** T Peto, G Cooke.

## List of SAFO investigators

The SAFO trial group consists of:

### Participating Centres:

**Hospital Universitari de Bellvitge:** S Grillo, M Pujol, D Berbel, S Videla, P Hereu, A Padullés, N Pallarès, C Tebé, MA Domínguez, RF Rigo-Bonnin, G Horna, D Mediavilla, M Sanllorente, J Carratalà.

**Hospital Clinic de Barcelona:** JM Miró, L Morata, G Cuervo, A Soriano, C Pitart.

**Hospital de la Santa Creu i Sant Pau:** J López-Contreras, A Izquierdo-Cárdenas, MA Rivera, V Pomar.

**Hospital Universitario Cruces:** G Euba, AJ Goikoetxea, M Aguirregabiria, R Rodríguez-Álvarez, MJ Blanco-Vidal.

**Hospital Universitari Parc Taulí:** O Gasch, A Gomila-Grange, M Alguacil-Guillen,

**Hospital Universitari Mútua Terrassa:** L Boix-Palop, B Dietl, M Xercavins.

**Hospital Universitario Lucus Agusti:** MJ García-País.

**Complejo Hospitalario Universitario de Vigo:** MT Pérez-Rodríguez, A Sousa, FJ Vasallo-Vidal.

**Hospital del Mar:** S Gómez-Zorrilla.

**Hospital de Sant Joan Despi Moises Broggi:** I Oriol, B Borjabad, A Coloma-Conde, R Clivillé-Abad, SX González-di Lauro.

**Hospital Universitario Virgen Macarena:** LE López-Cortés, M de Cueto, E Moreno-Mellado.

**Hospital Universitari Germans Trias i Pujol:** ML Pedro-Botet.

**Hospital 12 de Octubre:** R San-Juan, JM Aguado, J Tiago-Silva, MA Orellana.

**Hospital Universitario Ramón y Cajal:** F Gioia, P Vizcarra, AM Sánchez-Díaz.

**Hospital Universitari de Sant Joan:** S Iftimie, C Garcia, F Ballester.

**Hospital Universitari Arnau de Vilanova:** A Jover-Sáenz, MF Ramírez-Hidalgo, A Bellés-Bellés.

**Hospital Universitari de Tarragona Joan XXIII:** G García-Pardo, E Picó-Plana.

**Hospital Universitario La Paz:** B Loeches, M Ruíz-Bastian.

**Laboratori de Referència de Catalunya-UPF:** A Siverio-Parés.

**Hospital de Barcelona-SCIAS:** Y Meije, A Ribera, J Llaberia.

**Trial Coordination and Oversight:** S Grillo, M Pujol, J Carratalà. **Data Management Systems:** N Pallarès, C Tebé.

**Trial Steering Committee:** M Pujol (Chair), JM Miró, S Videla, J Carratalà.

**Data Monitoring Committee:** P Hereu (Chair), G Horna, D Mediavilla, M Sanllorente.

**Independent Endpoint Review Committee:** D Chivite, D Rodríguez, C Tebé.
